# Supplementary material for: Transcriptome analysis reveals the accelerated expression of genes related to photosynthesis and chlorophyll biosynthesis contribution to shade-tolerant in Phoebe bournei
Source: PubMed Central journal article supplement (PMC9158164; doi:10.1186/s12870-022-03657-y), 2022-06-01

DiffExp Gene Statistics

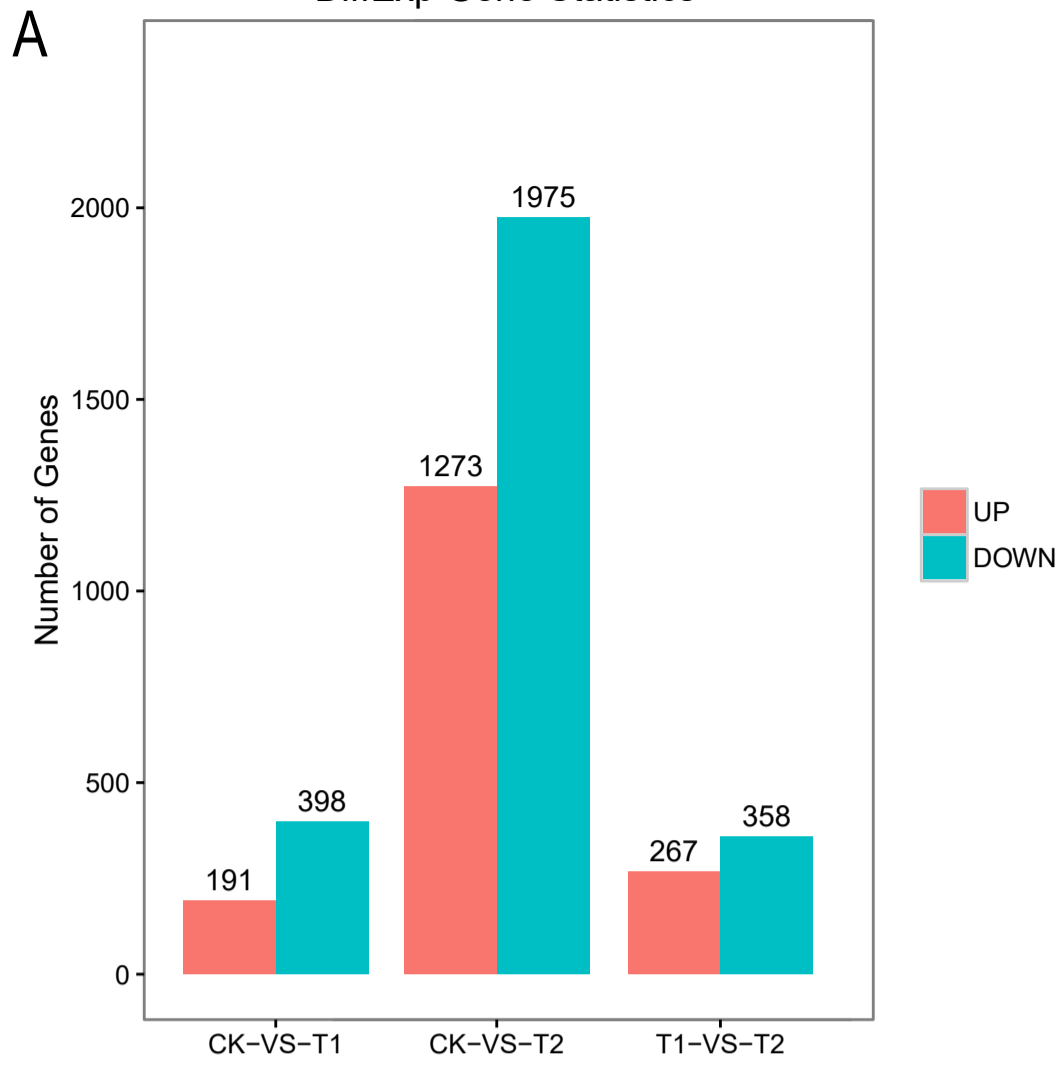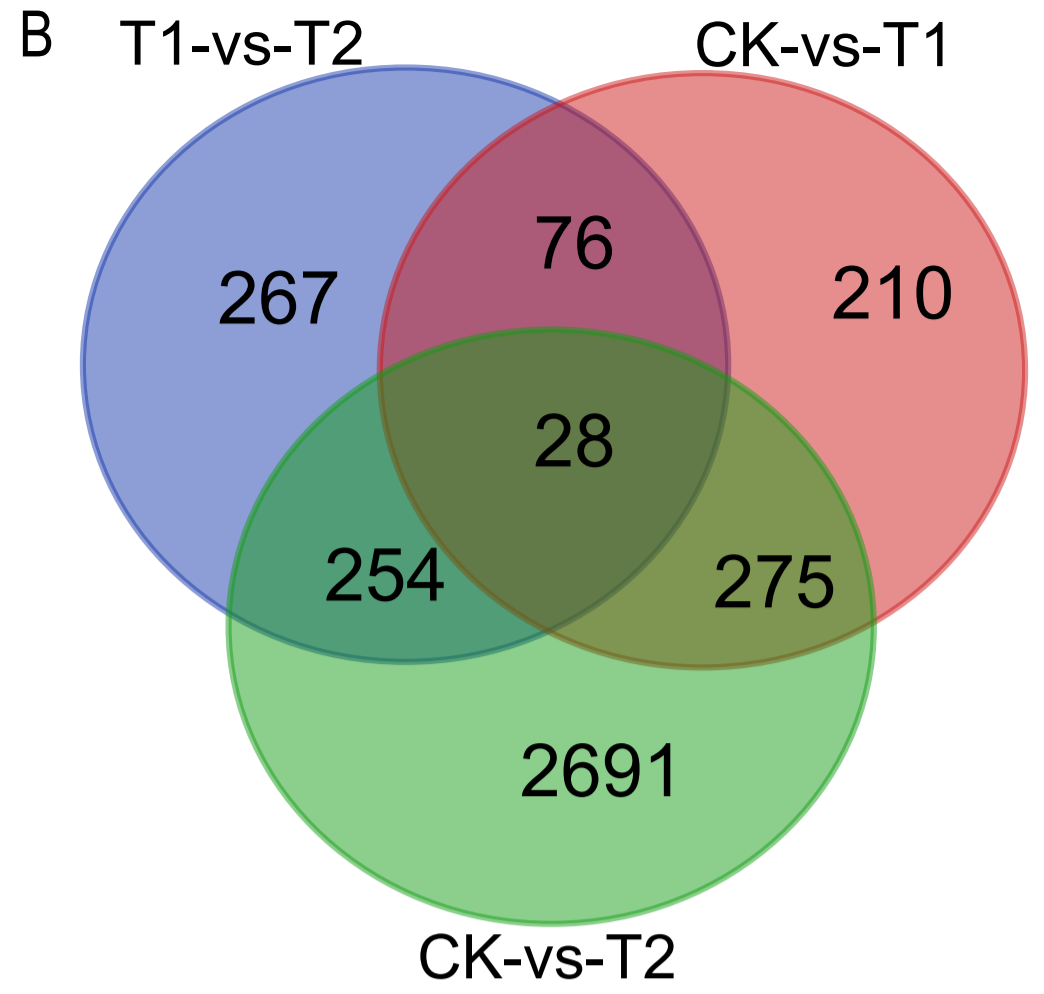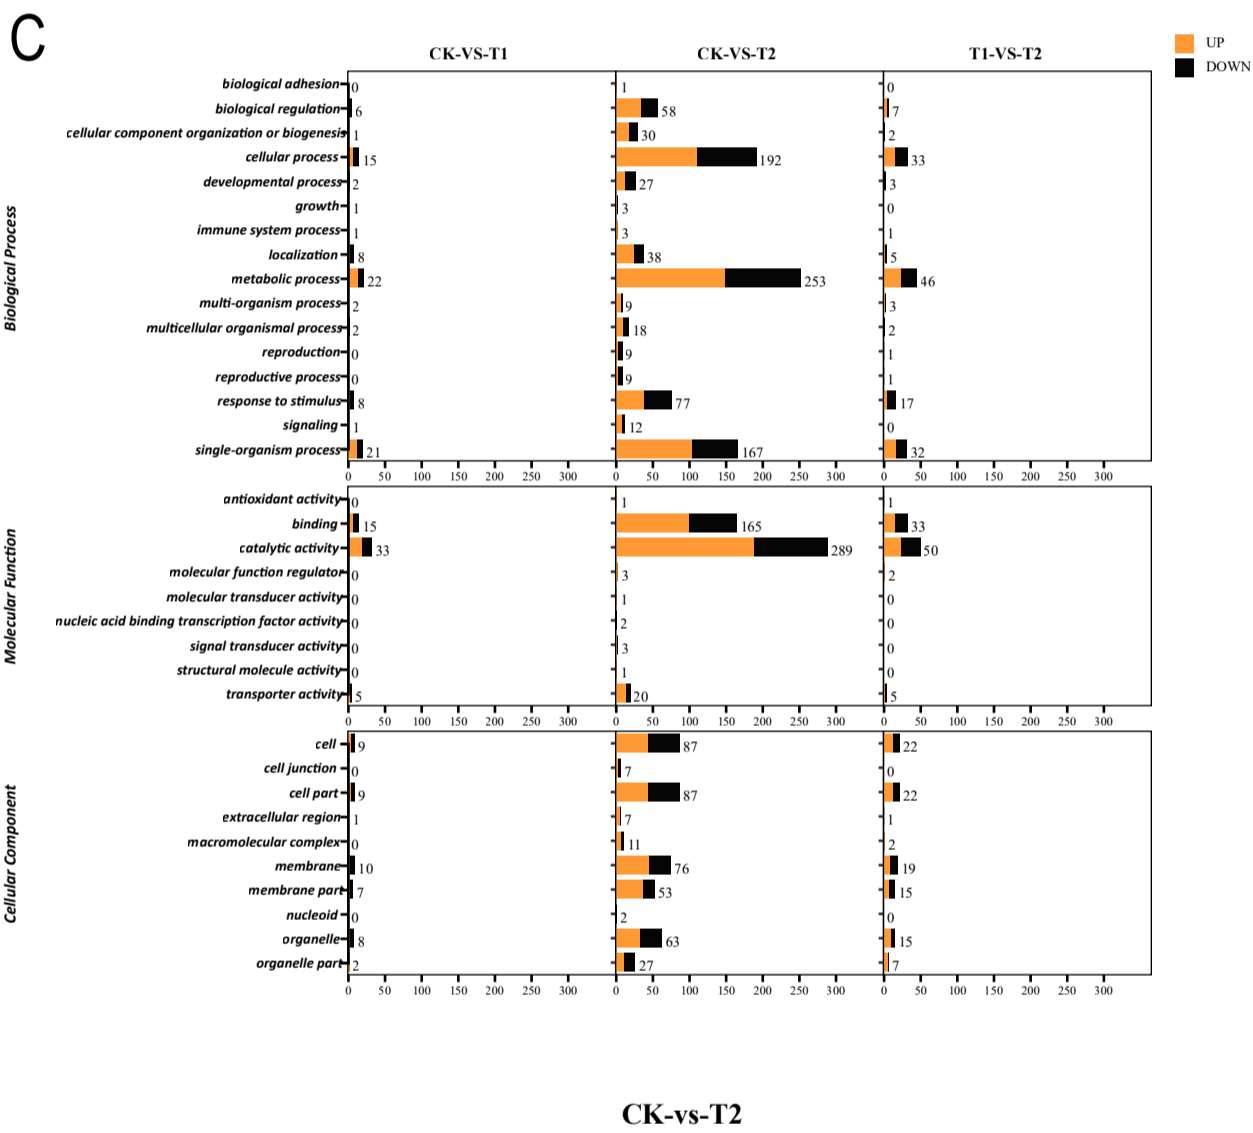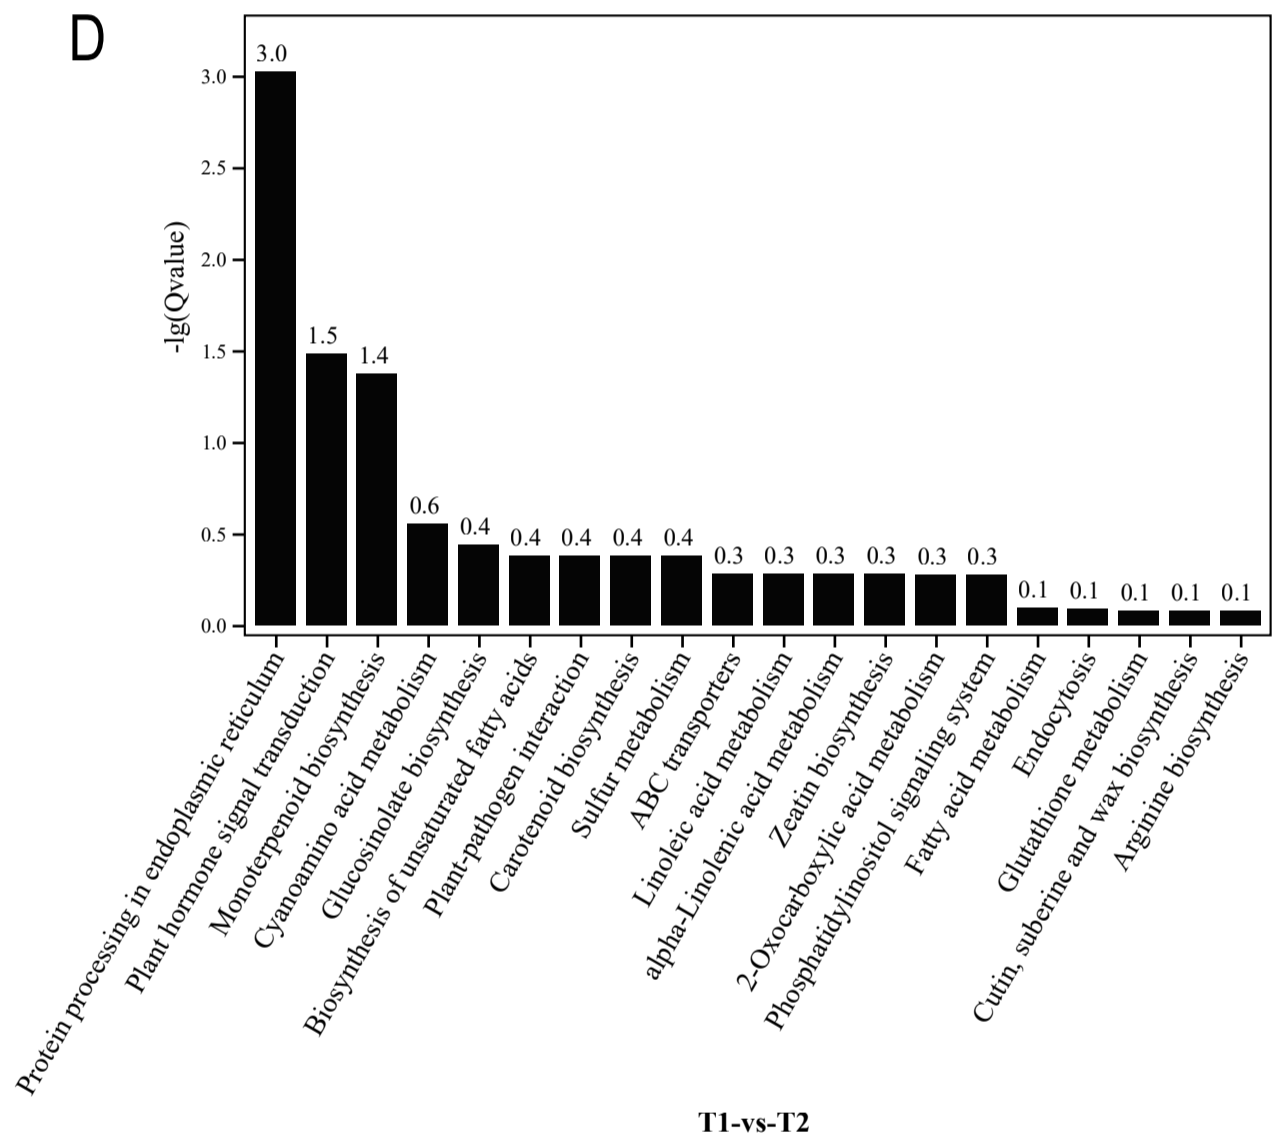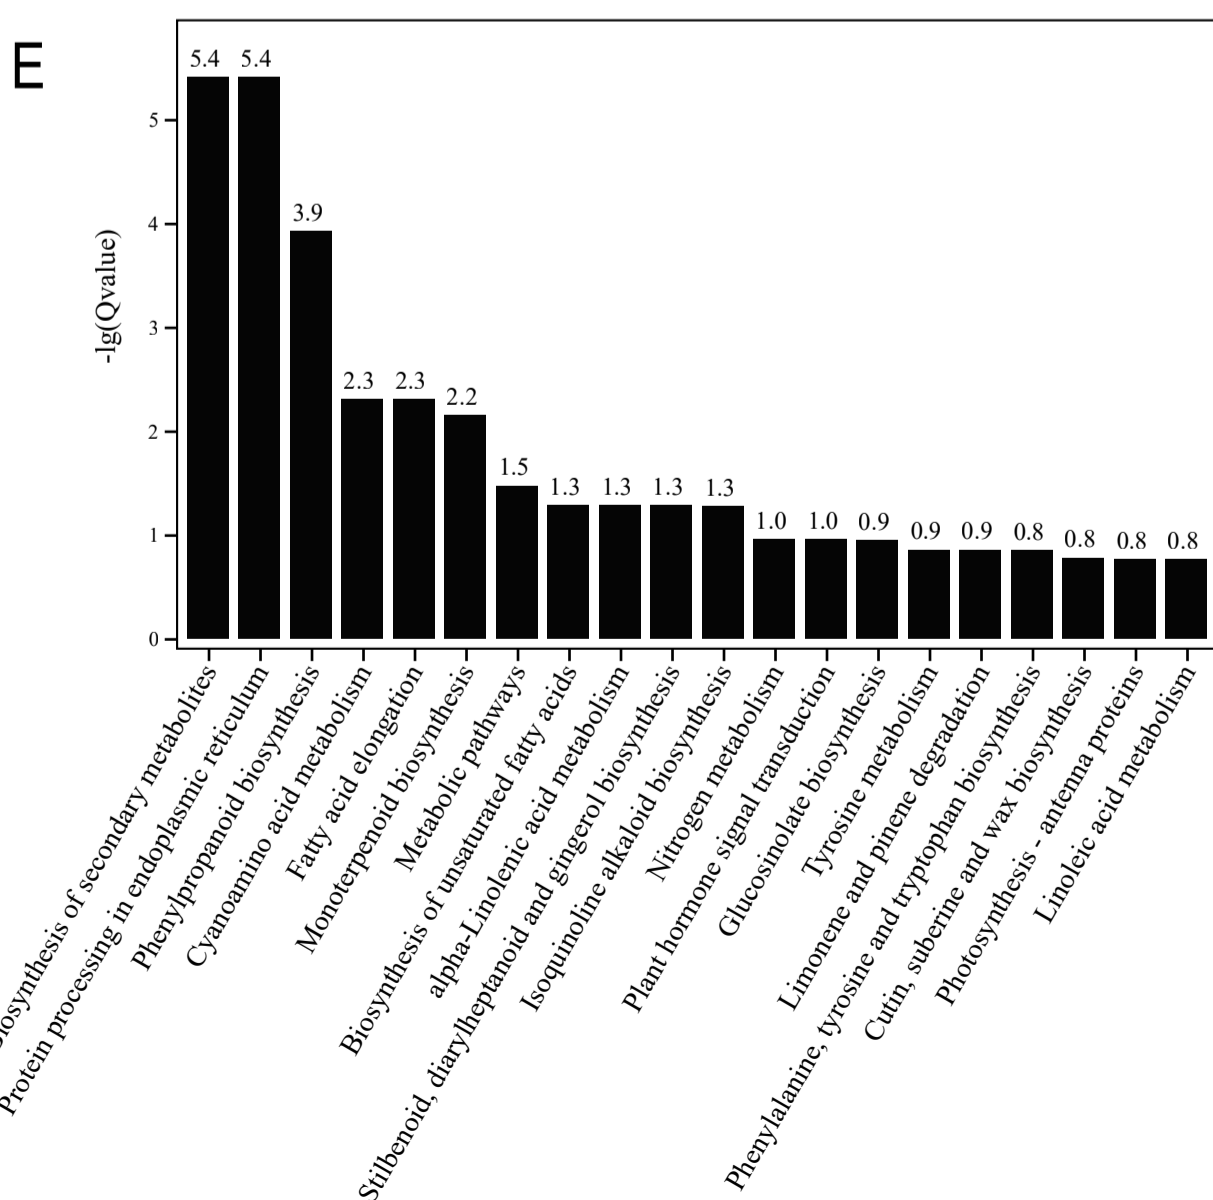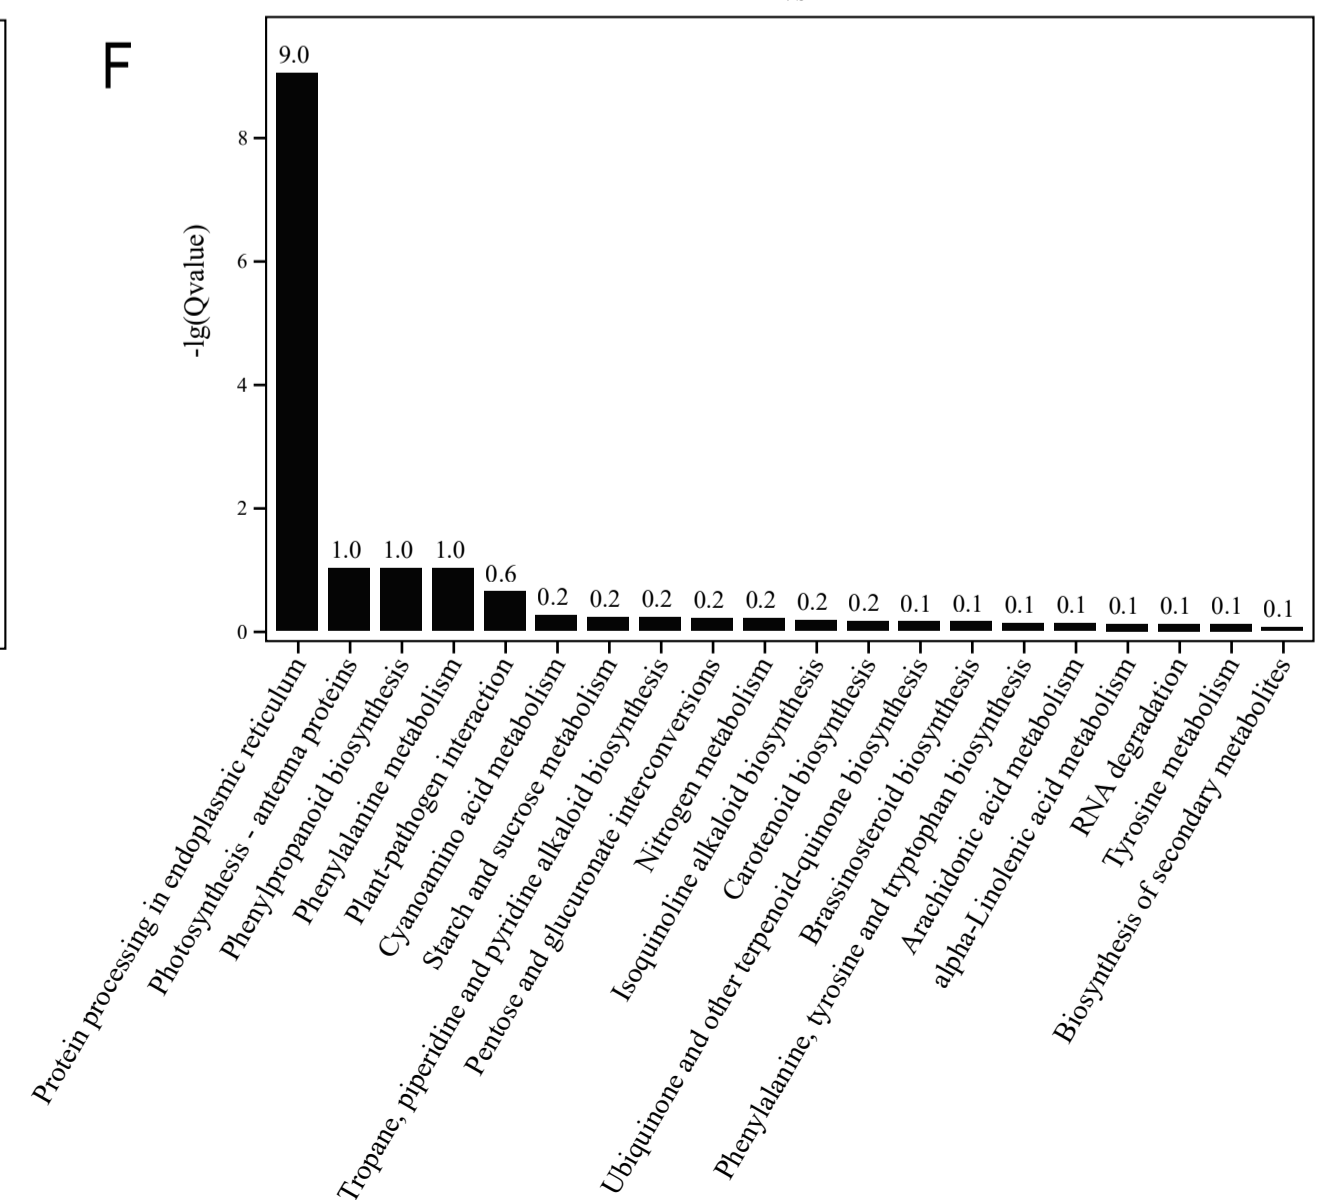

Supplement: 12870_2022_3657_MOESM1_ESM.pdf [file 12870_2022_3657_MOESM1_ESM.pdf]
